# Supplementary material
Source: Elsevier journal article supplement (https://www.sciencedirect.com/science/article/pii/S032575412030064X)
Supplement: mmc3 [file S032575412030064X:mmc3.docx]

**Table 4:** Cycling conditions for the amplification of Z1 and Z2 fragments

| HRMA assay | Cycling conditions | Denaturation step mode |
| --- | --- | --- |
| Sensitivity | 95 °C - 10 min; 40 x (95 °C - 15 s, 60 °C - 1 min); 95 °C - 10 s; 60 °C - 1 min; up to 95 °C - 15 s | Step and hold |
| Haplotype test | 95 °C - 10 min; 40 x (95 °C - 15 s, 60 °C - 1 min); 95 °C - 10 s; 60 °C - 1 min; up to 95 °C - 15 s; 60 °C - 15 s | Continuous |
