# Supplementary material
Source: Elsevier journal article supplement (https://www.sciencedirect.com/science/article/pii/S032575412030064X)
Supplement: mmc4 [file S032575412030064X:mmc4.docx]

**Table 5:** Parameters corresponding to quantification standard curves of each fragment analyzed

|  | Slope | Regression coefficient (R2) | Efficiency (Eff%) |
| --- | --- | --- | --- |
| Z1 | -3.331 | 0.995 | 99.627 |
| Z2 | -3.372 | 0.997 | 97.968 |
| Optimum value | -3.32 | 1.00 | 100 |
